# Supplementary material for: Nonparametric estimation method for river cross-sections with point cloud data from UAV photography URiver-X version 1.0 -methodology development
Source: Copernicus journal article supplement (doi:10.5194/gmd-2023-57), 2023-06-27
Supplement: Supplementary file 1 [file gmd-2023-57-supplement.pdf]

## Supplementary Material

### Tables

Table S1. Information for the tested four sites in the engineering study of 2019.

|        | X  | Z     |        | X  | Z     |
|--------|----|-------|--------|----|-------|
| Site-1 | 1  | 0     | Site-3 | 1  | 0     |
|        | 2  | 4.4   |        | 2  | 3.12  |
|        | 3  | 7.48  |        | 3  | 5.8   |
|        | 4  | 10.98 |        | 4  | 6.1   |
|        | 5  | 12.24 |        | 5  | 7.1   |
|        | 6  | 13.5  |        | 6  | 12.62 |
|        | 7  | 19.5  |        | 7  | 24.4  |
|        | 8  | 23.82 |        | 8  | 30.7  |
|        | 9  | 28.08 |        | 9  | 36.2  |
|        | 10 | 32.28 |        | 10 | 37.76 |
|        | 11 | 33.66 |        | 11 | 38.82 |
|        | 12 | 34.92 |        | 12 | 41.86 |
|        | 13 | 37.92 |        | 13 | 45.02 |
|        |    |       |        | 14 | 46.82 |
|        | X  | Z     |        | X  | Z     |
| Site-2 | 1  | 0     | Site-4 | 1  | 0     |
|        | 2  | 9.06  |        | 2  | 2.6   |
|        | 3  | 10.26 |        | 3  | 5.54  |
|        | 4  | 13.48 |        | 4  | 8.94  |
|        | 5  | 14.42 |        | 5  | 11.14 |
|        | 6  | 15.42 |        | 6  | 15.7  |
|        | 7  | 21.76 |        | 7  | 19.42 |
|        | 8  | 26.24 |        | 8  | 20.92 |
|        | 9  | 30.32 |        | 9  | 23.18 |
|        | 10 | 37    |        | 10 | 24.54 |
|        | 11 | 38.5  |        | 11 | 26.6  |
|        | 12 | 39.8  |        | 12 | 29.08 |
|        | 13 | 43    |        | 13 | 37    |
|        | 14 | 46.32 |        | 14 | 40    |
|        | 15 | 47.94 |        | 15 |       |

# Figures

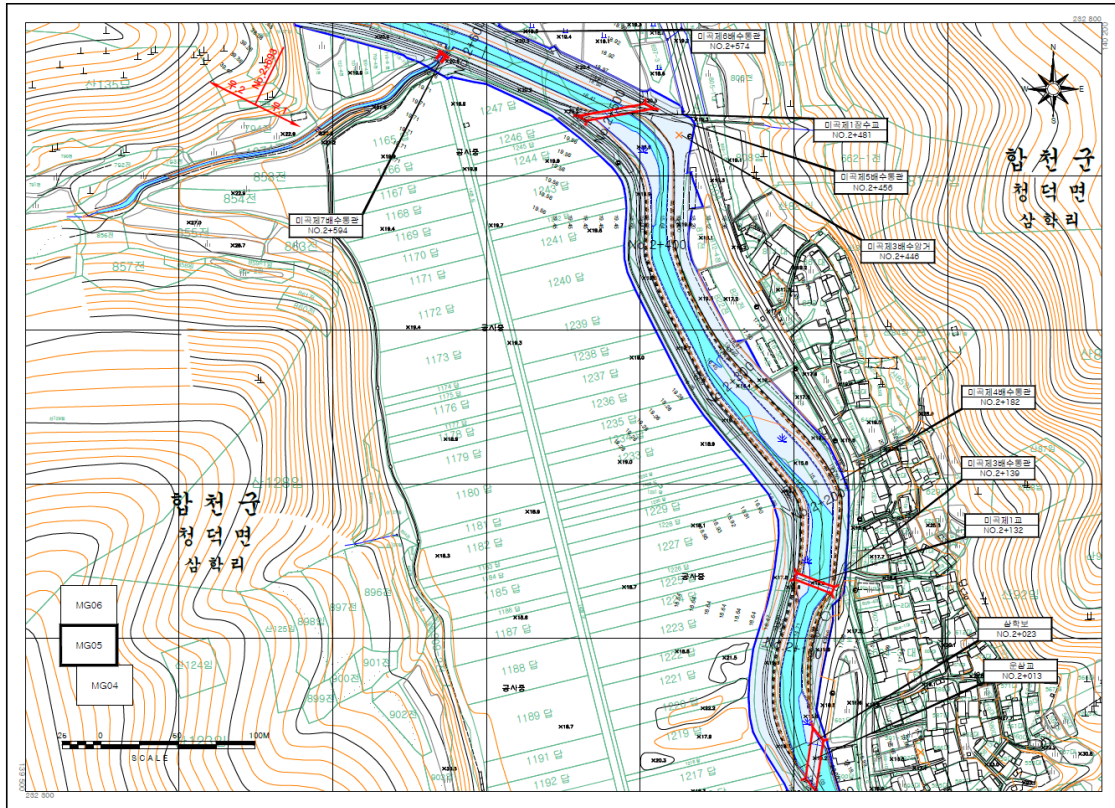

Figure S1. Plane map of the study area from the engineered study (2019) (Migok-cheon stream).

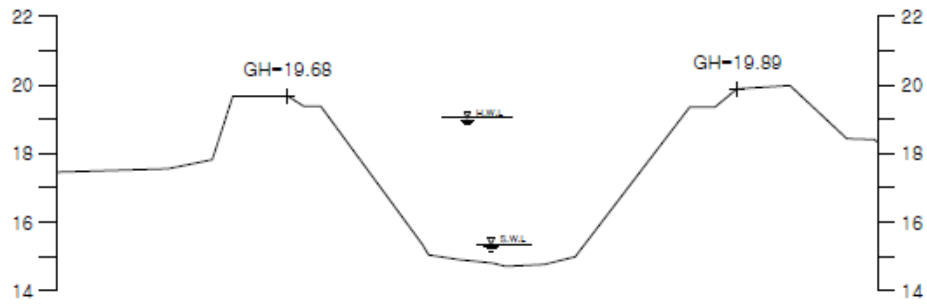

No. 2+100

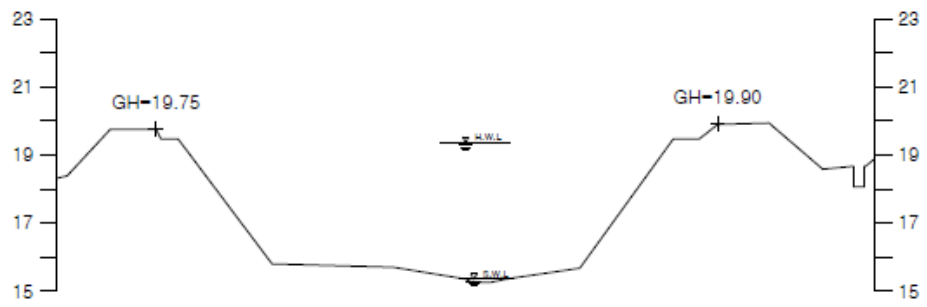

No. 2+200

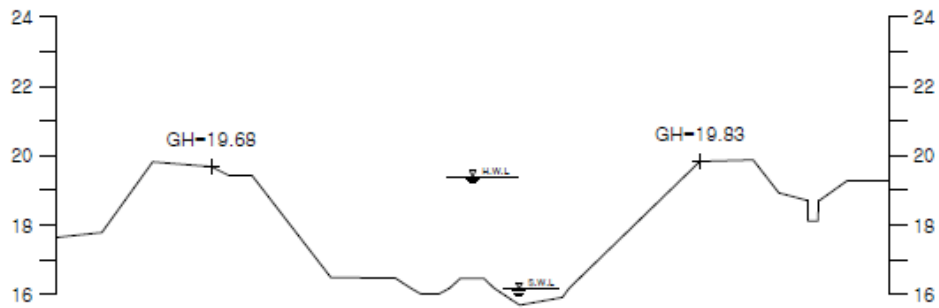

No. 2+300

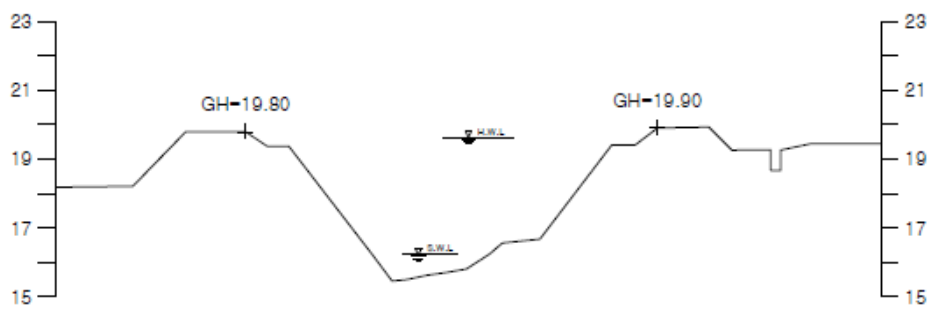

No. 2+400

Figure S2. Cross-sections of the tested site of the study area from the engineered study (2019) (Migok-cheon stream).

(a)

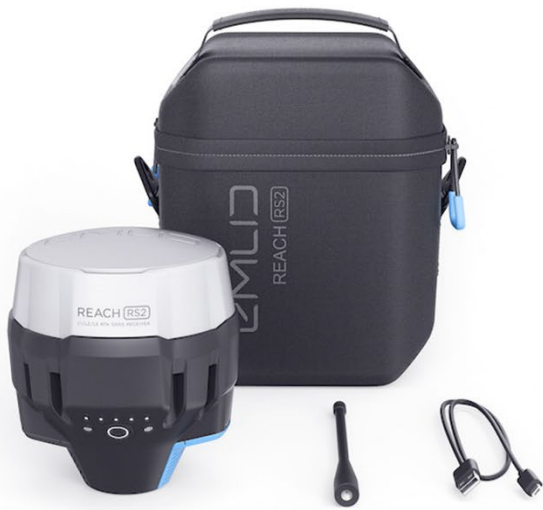

(b)

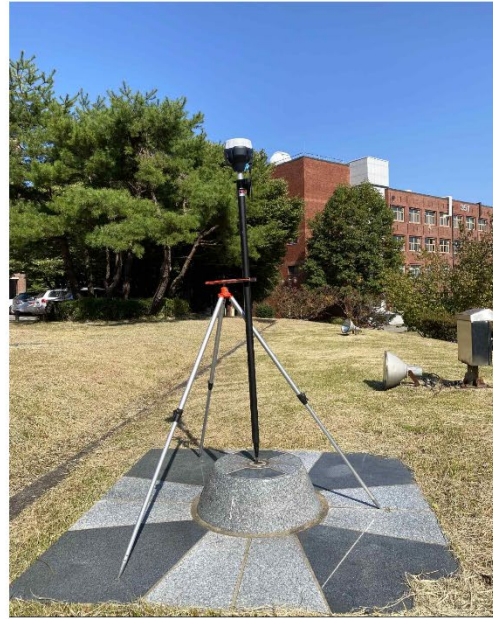

(c)

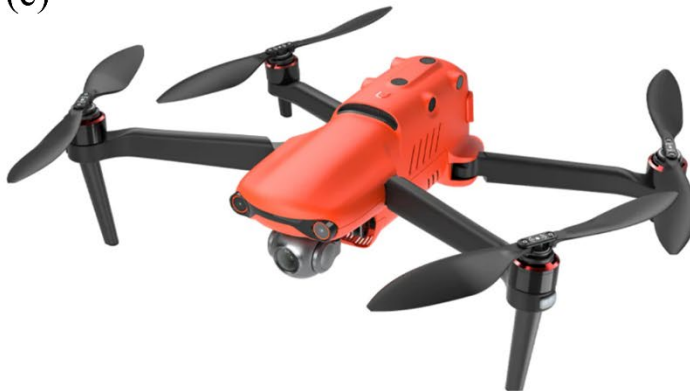

(d)

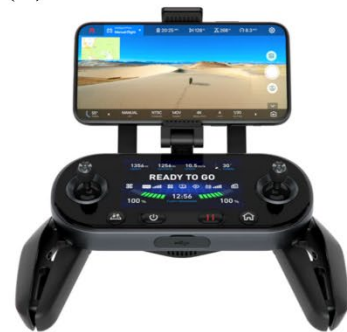

Figure S3. Pictures of (a) EMILID Reach RS2 for ground surveying and (b) its installed system; and (c) the employed UAV of the EVO II and (d) its controller.

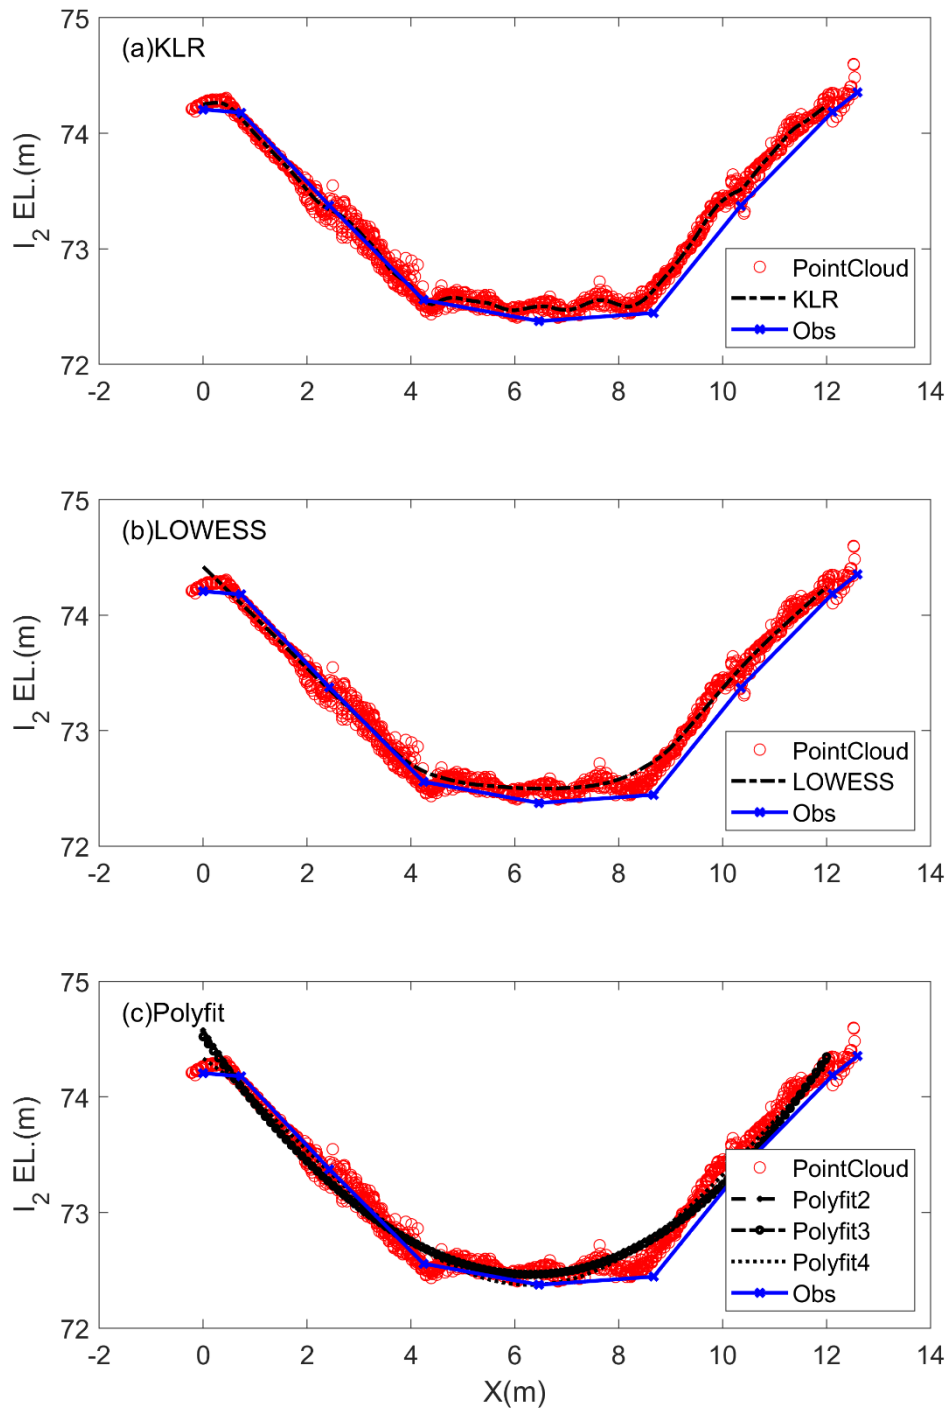

Figure S4. Point cloud data (red circles) for the channel  $I_2$  of the REC and model-fitted line (black dashed line) with KLR (panel(a)), LOWESS (panel(b)), and PolyFit (panel(c)) as well as the ground surveying (blue solid line with x marker).

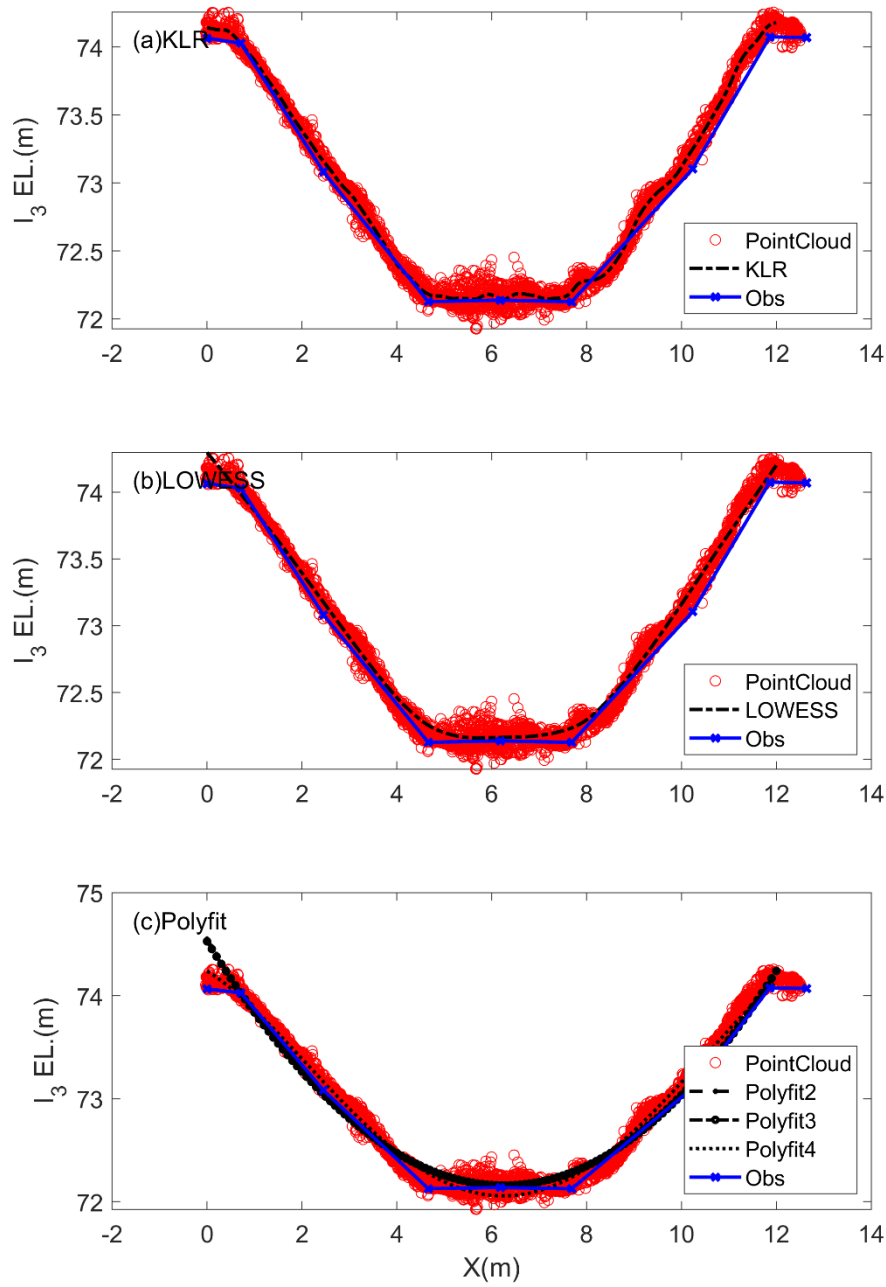

Figure S5. Point cloud data (red circles) for the channel I<sub>3</sub> of the REC and model-fitted line (black dashed line) with KLR (panel(a)), LOWESS (panel(b)), and PolyFit (panel(c)) as well as the ground surveying (blue solid line with x marker).

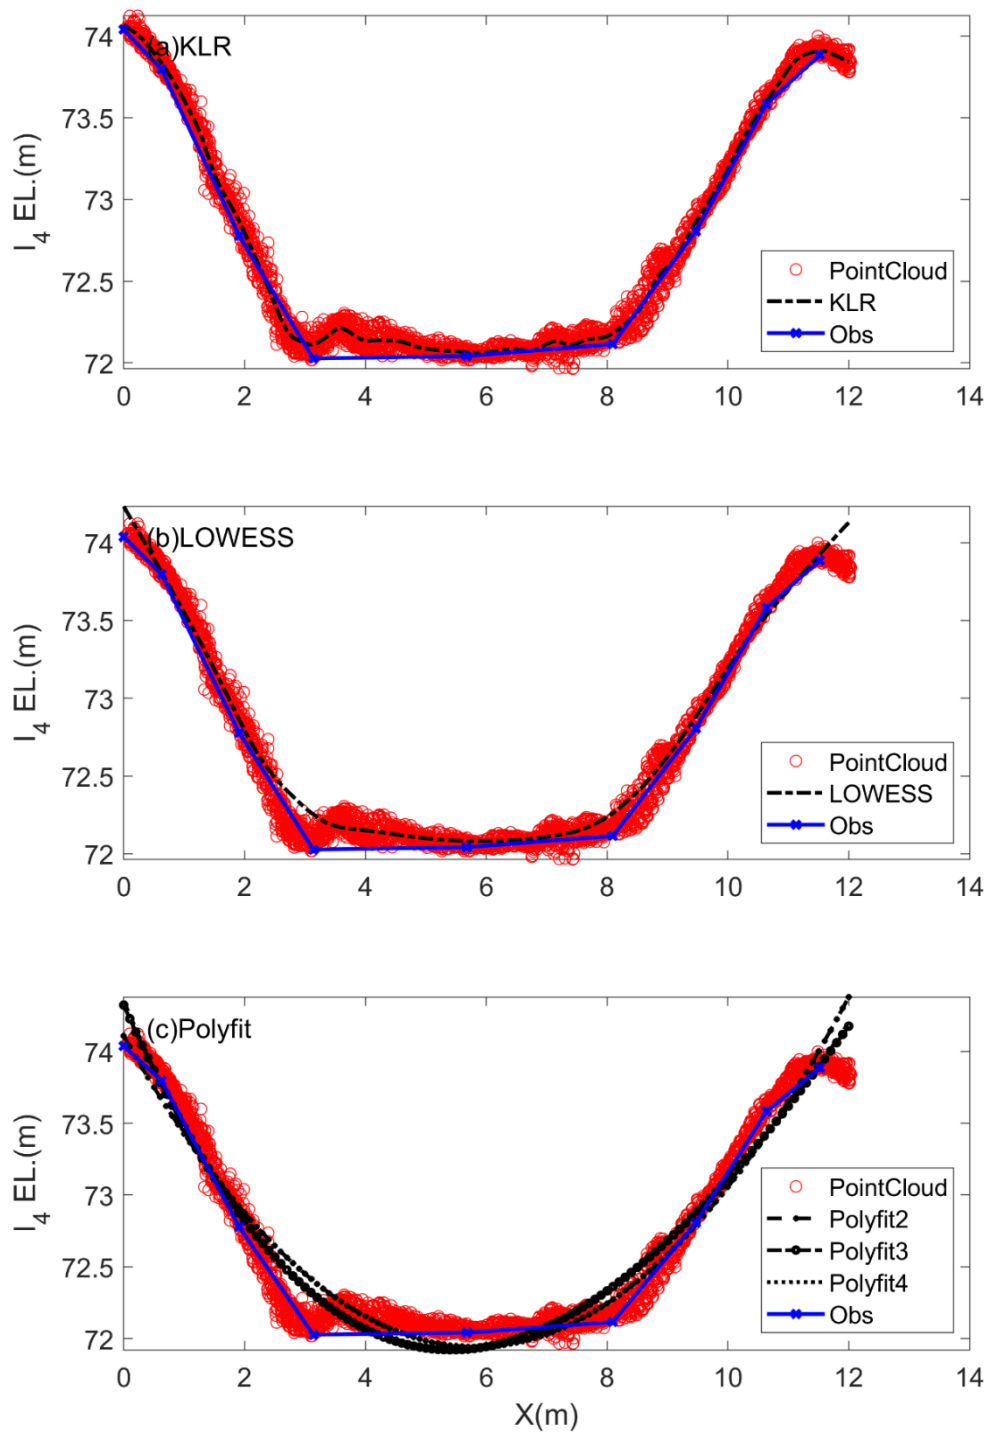

Figure S6. Point cloud data (red circles) for the channel I<sub>4</sub> of the REC and model-fitted line (black dashed line) with KLR (panel(a)), LOWESS (panel(b)), and PolyFit (panel(c)) as well as the ground surveying (blue solid line with x marker).

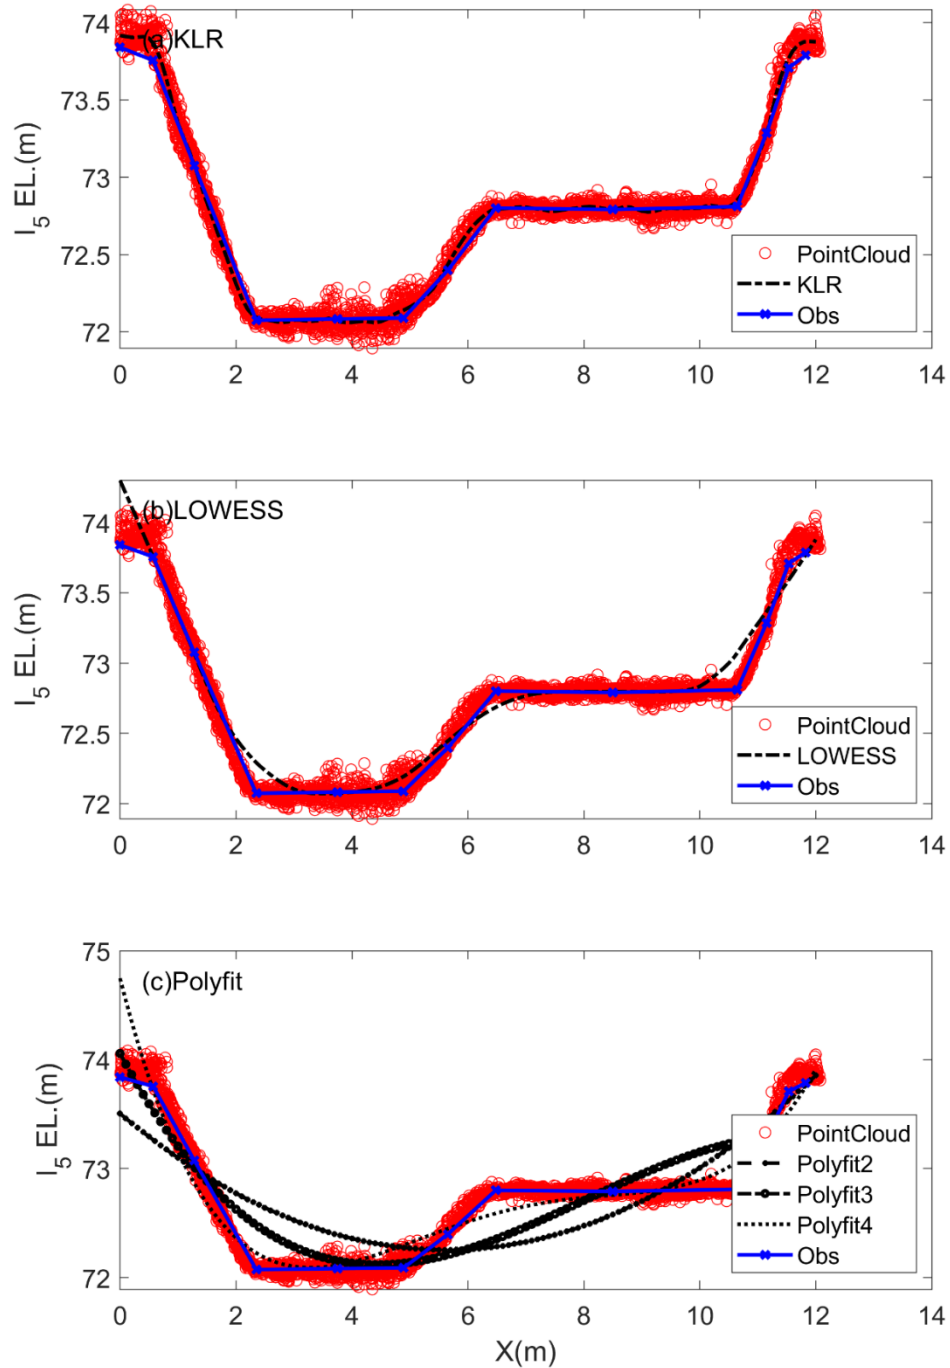

Figure S7. Point cloud data (red circles) for the channel I<sub>5</sub> of the REC and model-fitted line (black dashed line) with KLR (panel(a)), LOWESS (panel(b)), and PolyFit (panel(c)) as well as the ground surveying (blue solid line with x marker).



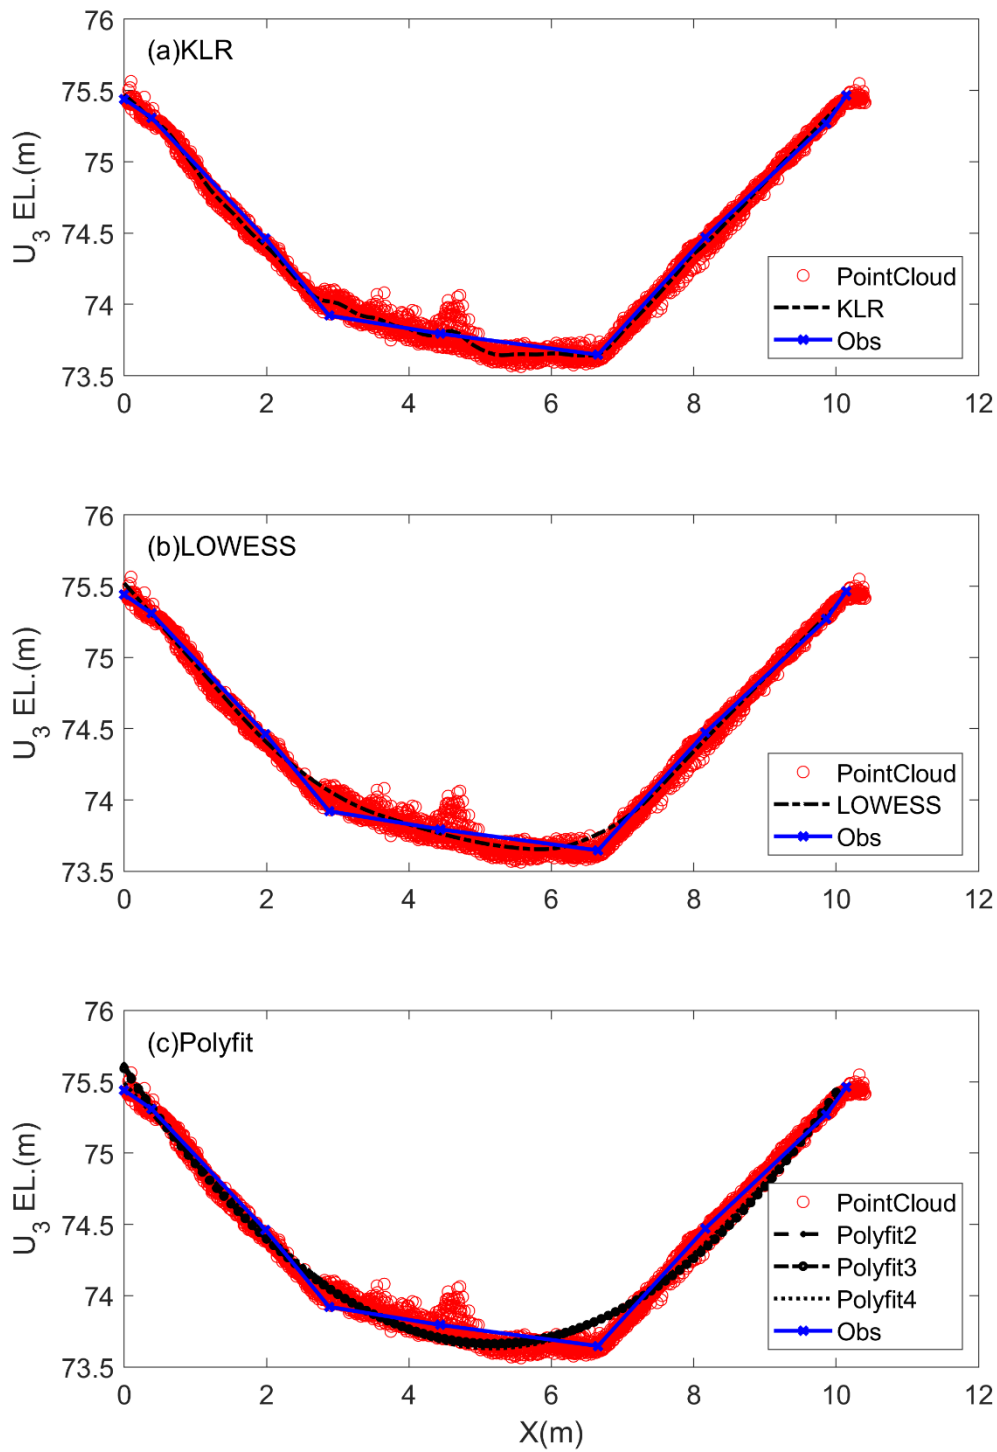

Figure S8. Point cloud data (red circles) for the channel  $U_3$  of the REC and model-fitted line (black dashed line) with KLR (panel(a)), LOWESS (panel(b)), and PolyFit (panel(c)) as well as the ground surveying (blue solid line with x marker).

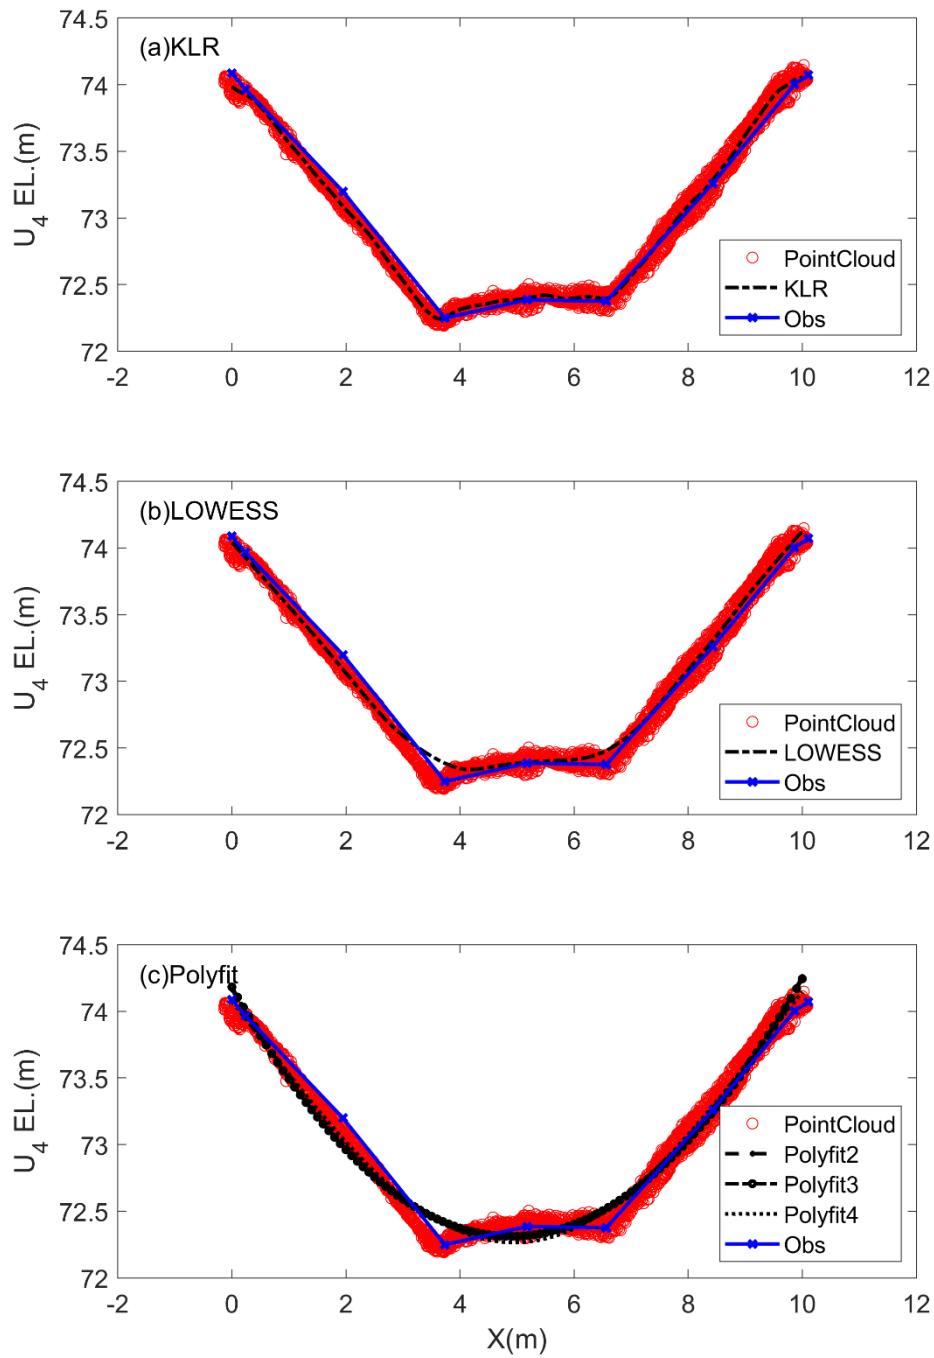

Figure S9. Point cloud data (red circles) for the channel U<sub>4</sub> of the REC and model-fitted line (black dashed line) with KLR (panel(a)), LOWESS (panel(b)), and PolyFit (panel(c)) as well as the ground surveying (blue solid line with x marker).

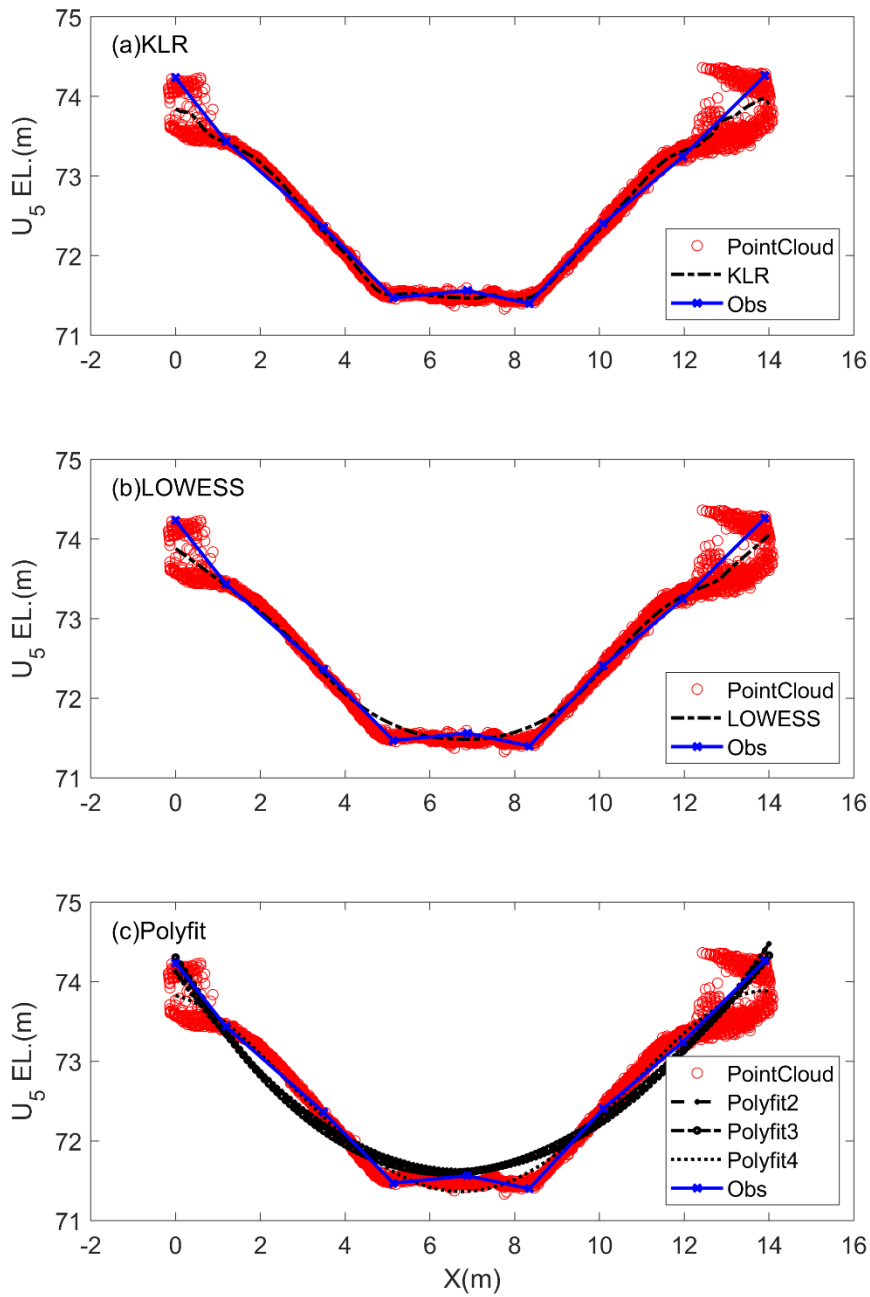

Figure S10. Point cloud data (red circles) for the channel  $U_5$  of the REC and model-fitted line (black dashed line) with KLR (panel(a)), LOWESS (panel(b)), and PolyFit (panel(c)) as well as the ground surveying (blue solid line with x marker).

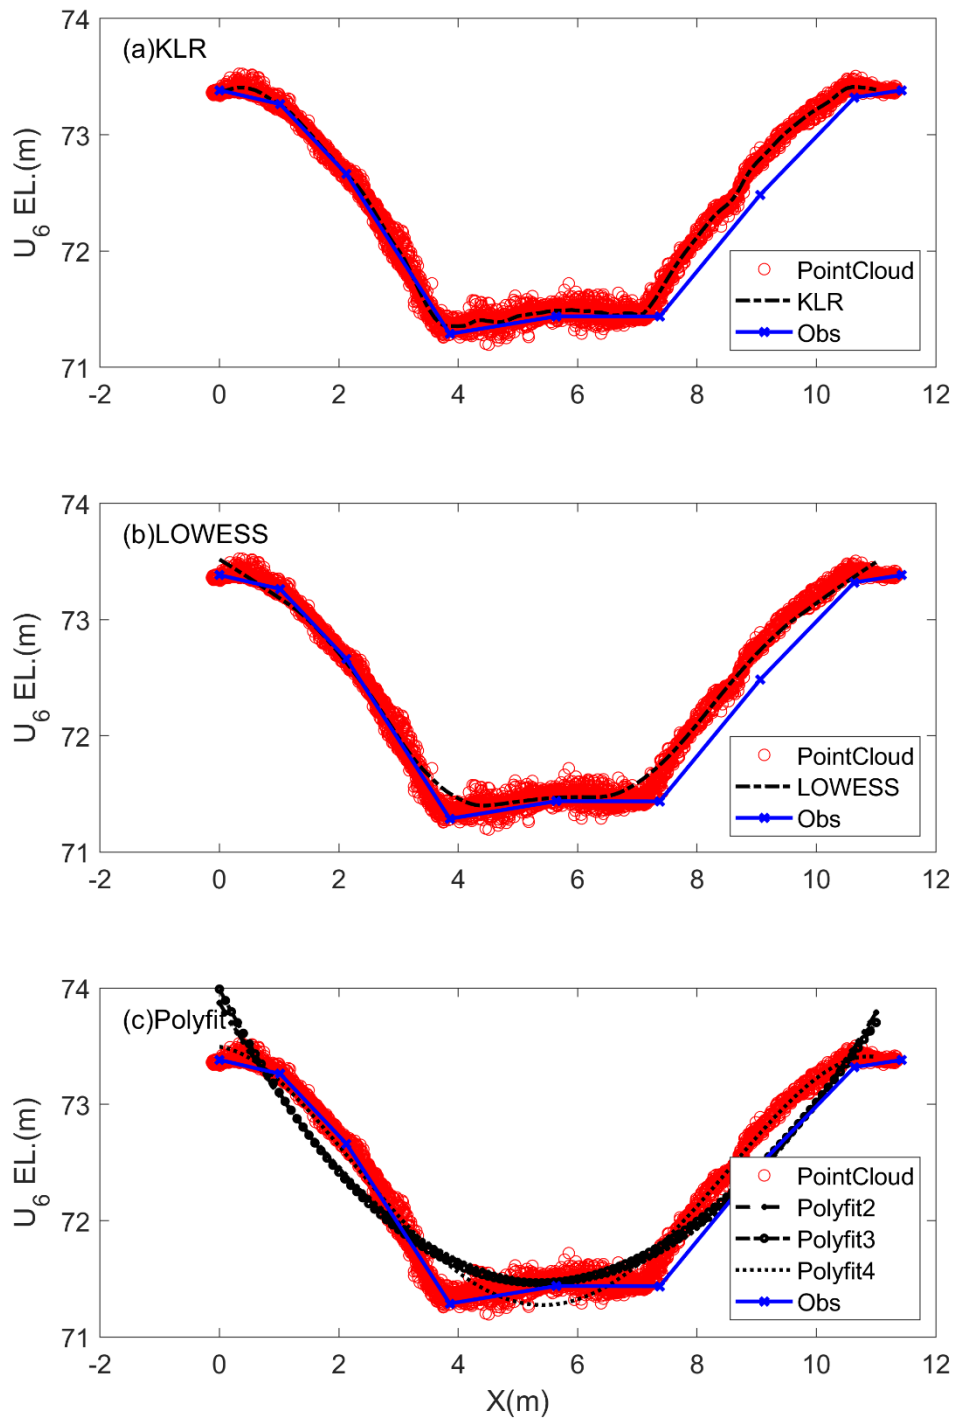

Figure S11. Point cloud data (red circles) for the channel  $U_6$  of the REC and model-fitted line (black dashed line) with KLR (panel(a)), LOWESS (panel(b)), and PolyFit (panel(c)) as well as the ground surveying (blue solid line with x marker).

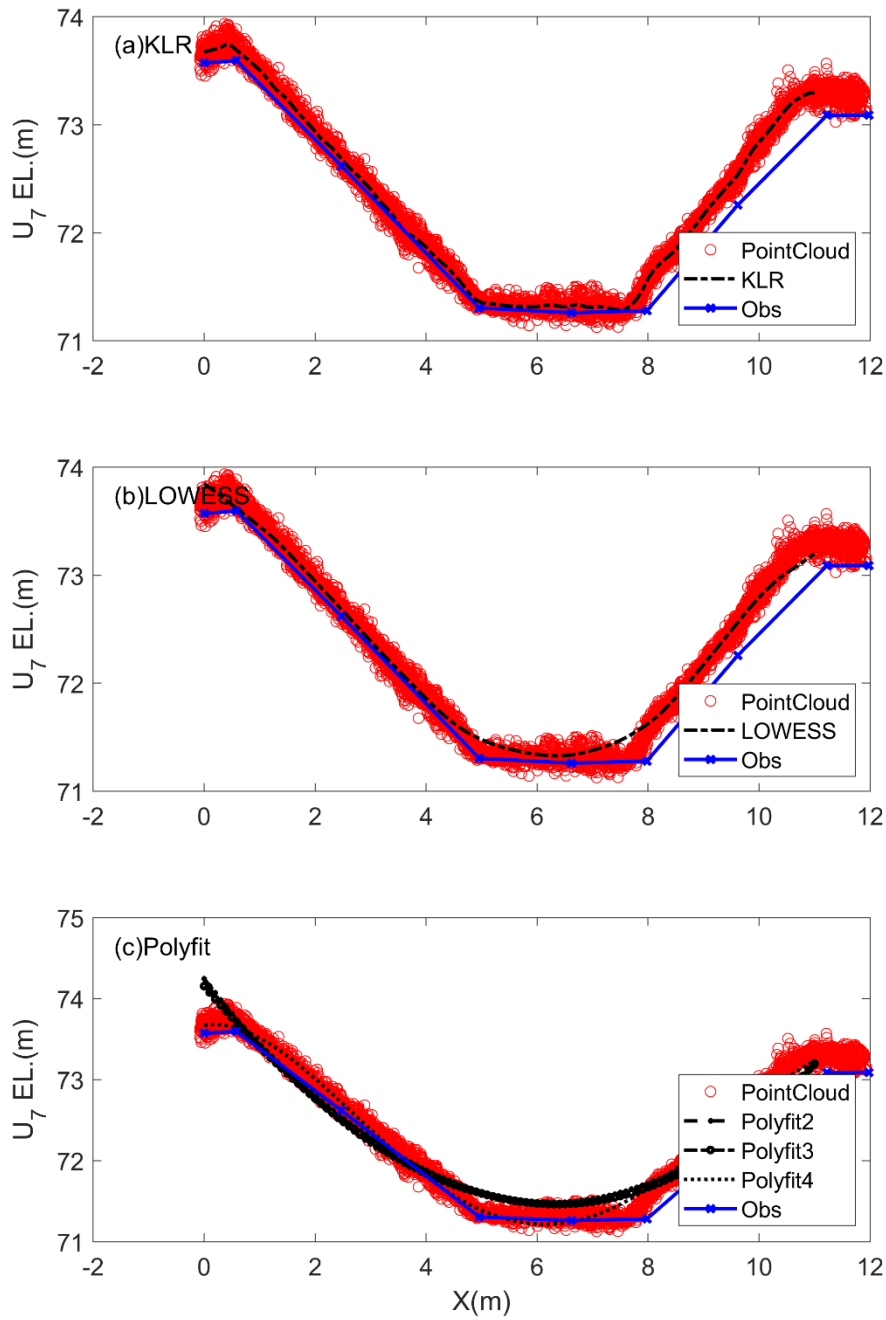

Figure S12. Point cloud data (red circles) for the channel  $U_7$  of the REC and model-fitted line (black dashed line) with KLR (panel(a)), LOWESS (panel(b)), and PolyFit (panel(c)) as well as the ground surveying (blue solid line with x marker).

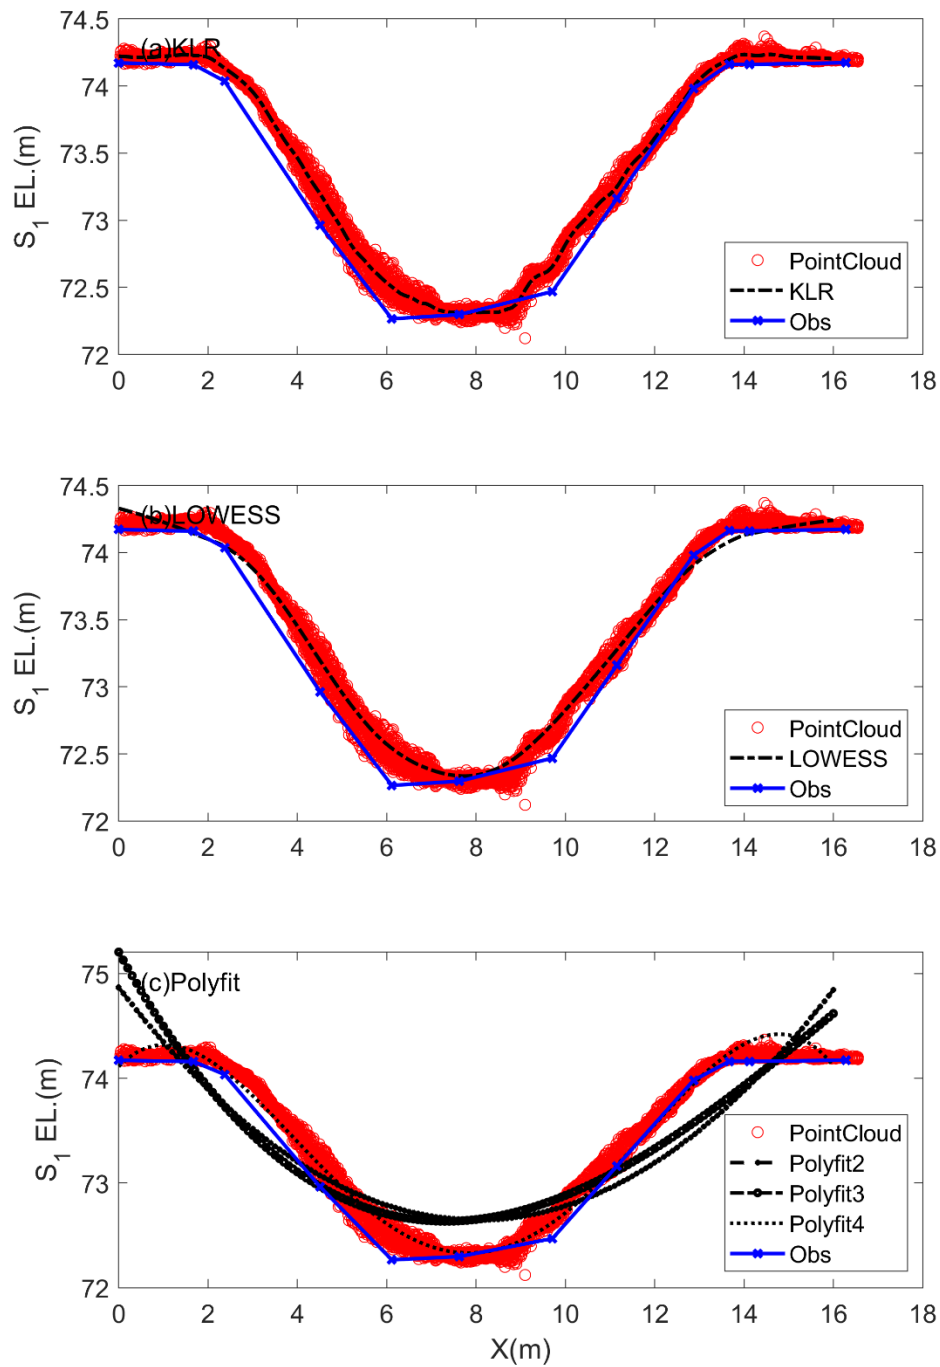

Figure S13. Point cloud data (red circles) for the channel  $S_1$  of the REC and model-fitted line (black dashed line) with KLR (panel(a)), LOWESS (panel(b)), and PolyFit (panel(c)) as well as the ground surveying (blue solid line with x marker).

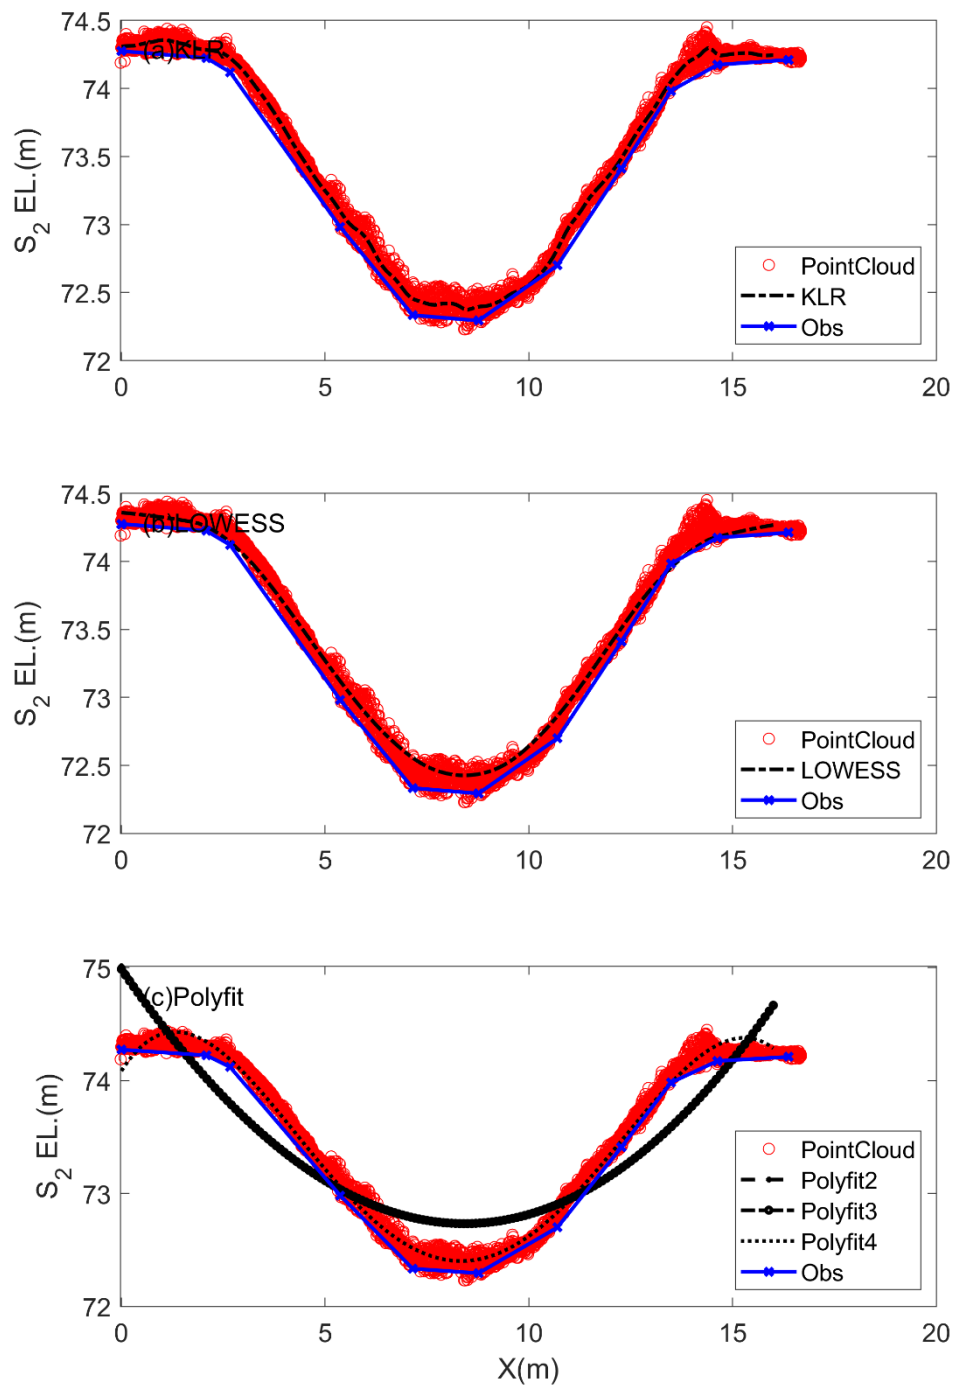

Figure S14. Point cloud data (red circles) for the channel S<sub>2</sub> of the REC and model-fitted line (black dashed line) with KLR (panel(a)), LOWESS (panel(b)), and PolyFit (panel(c)) as well as the ground surveying (blue solid line with x marker).

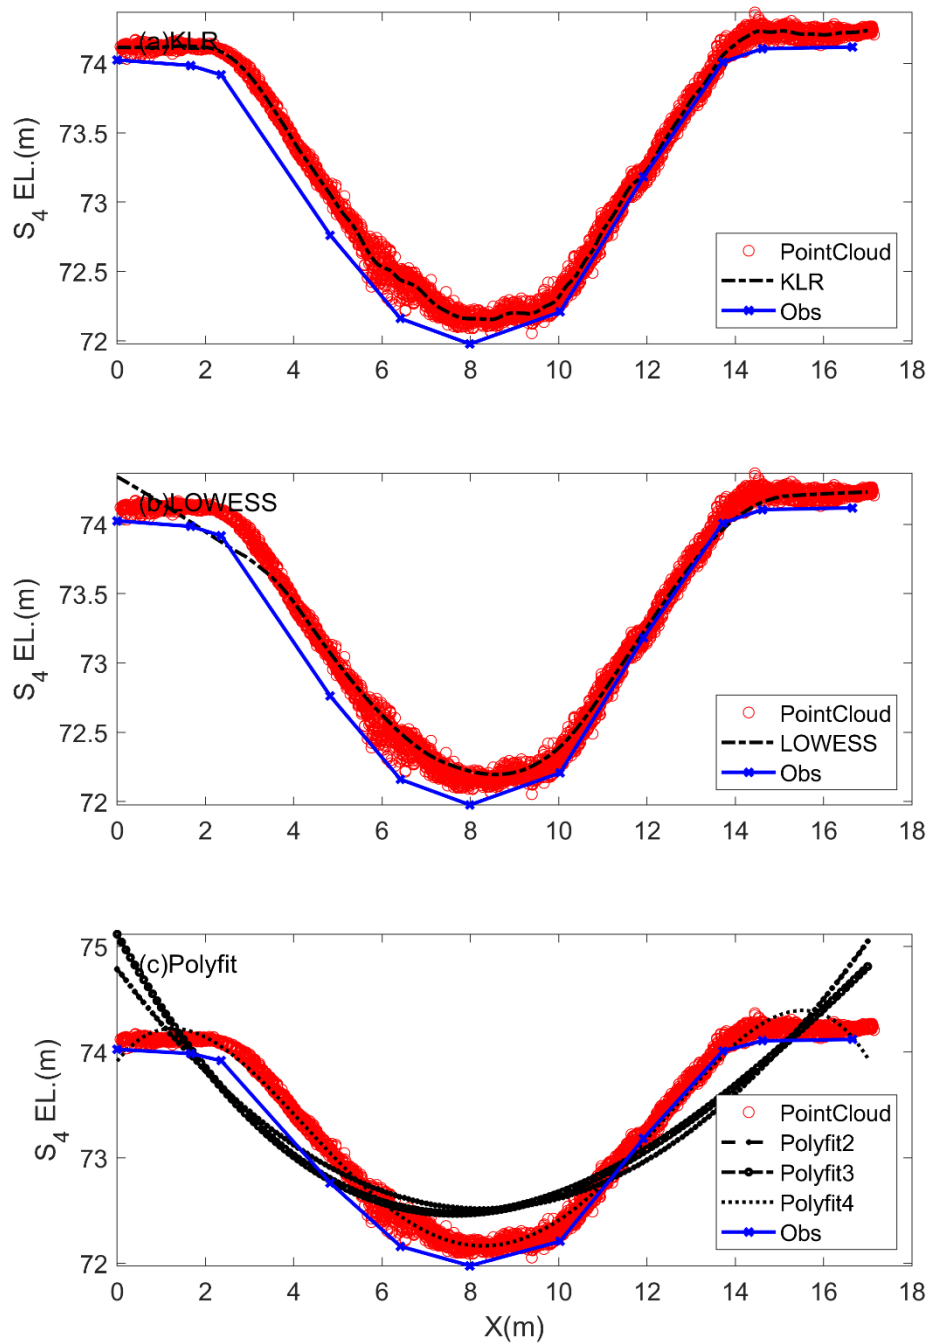

Figure S15. Point cloud data (red circles) for the channel  $S_4$  of the REC and model-fitted line (black dashed line) with KLR (panel(a)), LOWESS (panel(b)), and PolyFit (panel(c)) as well as the ground surveying (blue solid line with x marker).



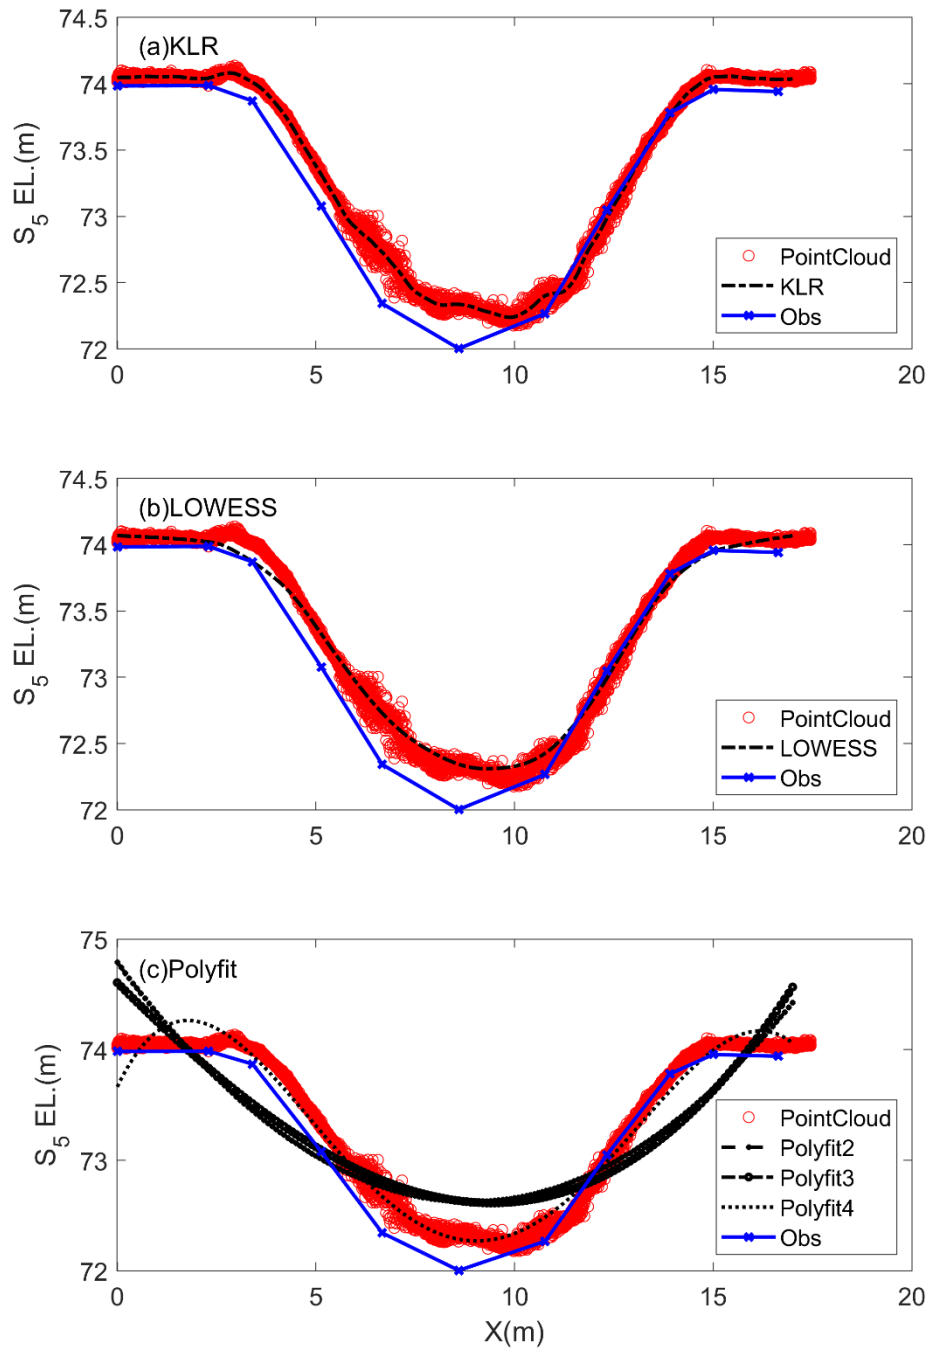

Figure S16. Point cloud data (red circles) for the channel  $S_5$  of the REC and model-fitted line (black dashed line) with KLR (panel(a)), LOWESS (panel(b)), and PolyFit (panel(c)) as well as the ground surveying (blue solid line with x marker).

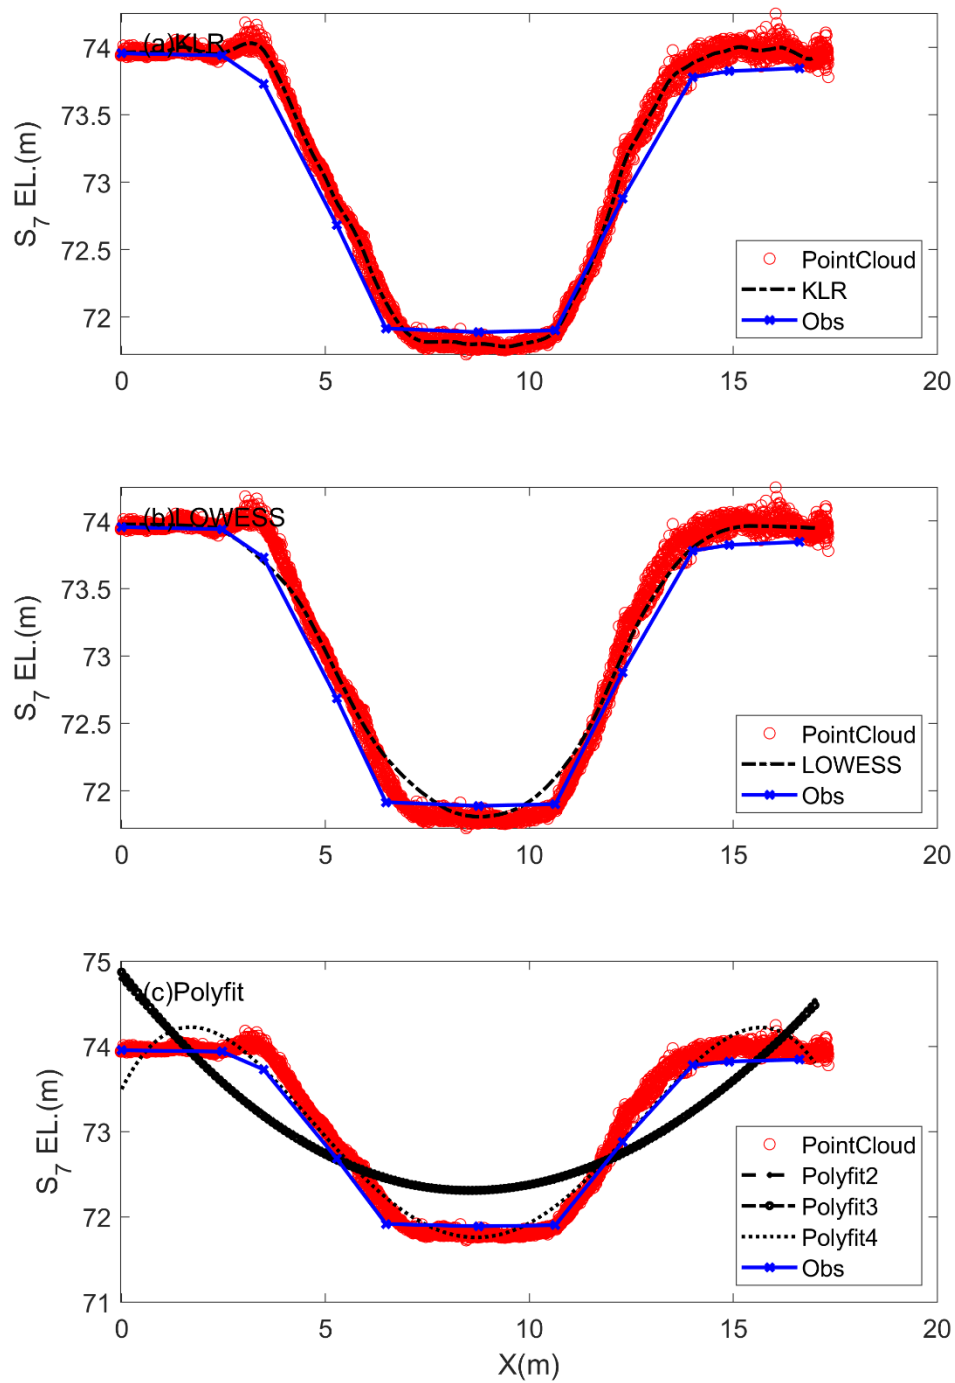

Figure S17. Point cloud data (red circles) for the channel  $S_7$  of the REC and model-fitted line (black dashed line) with KLR (panel(a)), LOWESS (panel(b)), and PolyFit (panel(c)) as well as the ground surveying (blue solid line with x marker).
